# Supplementary material for: Bone marrow Adipoq-lineage progenitors are a major cellular source of M-CSF that dominates bone marrow macrophage development, osteoclastogenesis, and bone mass
Source: eLife. 2023 Feb 13;12:e82118. doi: 10.7554/eLife.82118 (PMC10005769; doi:10.7554/eLife.82118)
Supplement: Figure 4—figure supplement 2—source data 1. [file elife-82118-fig4-figsupp2-data1.xlsx]

## Sheet: Fig.4-suppl 2
EWAT-SVF
Csf1f/f	Csf1ΔAdipoq
1.0284	1.04019
0.871711	0.971832
0.952113
IngWAT-SVF
Csf1f/f	Csf1ΔAdipoq
1.02388	0.94904
0.825976	1.13888
0.859084
