# Supplementary material for: Bone marrow Adipoq-lineage progenitors are a major cellular source of M-CSF that dominates bone marrow macrophage development, osteoclastogenesis, and bone mass
Source: eLife. 2023 Feb 13;12:e82118. doi: 10.7554/eLife.82118 (PMC10005769; doi:10.7554/eLife.82118)
Supplement: Figure 4—figure supplement 3—source data 1. [file elife-82118-fig4-figsupp3-data1.xlsx]

## Sheet: Fig. 4-figure supplement 3
Il6			Tnf			Il1b			Csf2			Il10
Csf1f/f	Csf1ΔAdipoQ		Csf1f/f	Csf1ΔAdipoQ		Csf1f/f	Csf1ΔAdipoQ		Csf1f/f	Csf1ΔAdipoQ		Csf1f/f	Csf1ΔAdipoQ
1.5178	1		0.967803	1		0.93411	1		0.69706	1		0.469249	1
1.02401	0.967348		1.03215	0.941729		0.914325	0.992937		0.831662	0.759351		1.55152	0.465275
1.14872	1.31305		1.02018	0.906521		0.927811	0.964957		0.882115	0.61802		0.719015	0.480377
Il34			Cxcl12
Csf1f/f	Csf1ΔAdipoQ		Csf1f/f	Csf1ΔAdipoQ
1.22201	2.55784		0.994011	1
1.01837	2.03099		1.02021	1.03706
3.73179	2.07307		1.06364	1.07534
1.49886	1.06979
	2.62551
	1.09864
