# Supplementary material for: Bone marrow Adipoq-lineage progenitors are a major cellular source of M-CSF that dominates bone marrow macrophage development, osteoclastogenesis, and bone mass
Source: eLife. 2023 Feb 13;12:e82118. doi: 10.7554/eLife.82118 (PMC10005769; doi:10.7554/eLife.82118)
Supplement: Figure 4—figure supplement 4—source data 1. [file elife-82118-fig4-figsupp4-data1.xlsx]

## Sheet: Fig. 4-figure supplement 4 
WT	KO
23.84	24.14
26.41	25.57
24.56	25.01
23.88	24.24
23.01	24.41
23.36	22.78
