# Supplementary material for: Bone marrow Adipoq-lineage progenitors are a major cellular source of M-CSF that dominates bone marrow macrophage development, osteoclastogenesis, and bone mass
Source: eLife. 2023 Feb 13;12:e82118. doi: 10.7554/eLife.82118 (PMC10005769; doi:10.7554/eLife.82118)
Supplement: Figure 4—figure supplement 5—source data 1. [file elife-82118-fig4-figsupp5-data1.xlsx]

## Sheet: Fig. 4-figure supplement 5  
BV/TV			BMD			Conn-Dens			Tb.Th			Tb.Sp			Tb.N
Csf1f/f	Csf1f/+ΔAdipoQ		Csf1f/f	Csf1f/+ΔAdipoQ		Csf1f/f	Csf1f/+ΔAdipoQ		Csf1f/f	Csf1f/+ΔAdipoQ		Csf1f/f	Csf1f/+ΔAdipoQ		Csf1f/f	Csf1f/+ΔAdipoQ
10.71	9.8		87.2793	97.7263		228.028	206.431		0.0308	0.0364		0.234	0.193		3.9032	5.0939
12.75	9.92		108.112	110.925		232.761	170.555		0.0363	0.0366		0.1941	0.2047		4.3605	4.791
12.21	12.49		107.524	136.758		260.65	239.079		0.0366	0.0423		0.1974	0.1959		4.1867	4.9953
12.73	14.67		108.178	105.148		286.945	248.542		0.0341	0.0418		0.1717	0.1718		5.5661	5.5648
9.11	15.48		66.06	108.798		254.916	240.922		0.0316	0.0324		0.1893	0.1752		5.0865	5.581
