# Supplementary material for: Bone marrow Adipoq-lineage progenitors are a major cellular source of M-CSF that dominates bone marrow macrophage development, osteoclastogenesis, and bone mass
Source: eLife. 2023 Feb 13;12:e82118. doi: 10.7554/eLife.82118 (PMC10005769; doi:10.7554/eLife.82118)
Supplement: Figure 4—figure supplement 6—source data 1. [file elife-82118-fig4-figsupp6-data1.xlsx]

## Sheet: Fig. 4-figure supplement 6
BV/TV			Conn-Dens			Tb.N			Tb.Th			Tb.sp			BMD
Csf1f/f	Csf1ΔAdipoQ		Csf1f/f	Csf1ΔAdipoQ		Csf1f/f	Csf1ΔAdipoQ		Csf1f/f	Csf1ΔAdipoQ		Csf1f/f	Csf1ΔAdipoQ		Csf1f/f	Csf1ΔAdipoQ
18.42	20.02		253.676	331.348		5.6092	5.6729		0.0433	0.0419		0.1734	0.1746		208.306	215.304
21.48	18.9		261.543	253.694		5.0661	5.1434		0.0459	0.0439		0.1907	0.1916		226.683	206.213
25.05	19.8		342.24	300.192		5.8281	5.2929		0.0455	0.0421		0.1675	0.1872		259.253	217.527
24.83	17.79		293.677	293.068		5.7114	5.4856		0.0487	0.0395		0.169	0.1781		255.917	199.738
17.41	24.62		269.778	312.545		5.1131	5.8031		0.0402	0.0472		0.1941	0.1643		192.021	255.917
