# Supplementary material for: Bone marrow Adipoq-lineage progenitors are a major cellular source of M-CSF that dominates bone marrow macrophage development, osteoclastogenesis, and bone mass
Source: eLife. 2023 Feb 13;12:e82118. doi: 10.7554/eLife.82118 (PMC10005769; doi:10.7554/eLife.82118)
Supplement: Figure 5—figure supplement 1—source data 1. [file elife-82118-fig5-figsupp1-data1.xlsx]

## Sheet: Fig. 5-figure supplement 1 B
BFR/BS		MAR
WT	KO	WT	KO
1.5403	1.4507	3.1686	2.9483
1.7614	1.6938	4.0987	3.0682
1.56	1.4146	3.1281	3.0538
2.4501	2.05	4.1169	3.7887
1.9037	1.3096	4.1929	3.4459

## Sheet: Fig. 5-figure supplement 1 C
BFR/BS		MAR
WT	KO	WT	KO
2.2702	3.1035	4.1871	4.7346
1.7774	1.9324	4.0646	5.0115
2.9574	2.6597	3.1281	4.8002
1.9021	1.9491	3.9642	3.6448
3.0209	3.6662	3.9804	3.3086
