# Supplementary material for: Bone marrow Adipoq-lineage progenitors are a major cellular source of M-CSF that dominates bone marrow macrophage development, osteoclastogenesis, and bone mass
Source: eLife. 2023 Feb 13;12:e82118. doi: 10.7554/eLife.82118 (PMC10005769; doi:10.7554/eLife.82118)
Supplement: Figure 5—figure supplement 2—source data 1. [file elife-82118-fig5-figsupp2-data1.xlsx]

## Sheet: Fig. 5-figure supplement 2A
Il6	Csf1f/f			Csf1ΔAdipoQ
0h	1	0.880598	1.0504	0.487226	2.2481	6.43139
6h	2460.25	2601.67	2689.29	2571.62	2968.26	3055.88
12h	1336.44	1353.46	1487.87	1175.42	1188.93	1378.05
24h	40.1651	55.6175	46.1141	34.6549	31.7969	53.5287
Tnf	Csf1f/f			Csf1ΔAdipoQ
0h	1	1.01555	1.04842	1.11382	1.12114	1.04884
6h	6.73447	6.75294	6.61191	7.36508	7.09722	7.56079
12h	3.11263	3.24434	3.32548	2.87967	2.92392	2.73796
24h	0.900767	0.883142	0.90087	0.98172	0.827926	0.889738
Il1b	Csf1f/f			Csf1ΔAdipoQ
0h	1	0.711138	1.58047	6.45226	5.88316	6.23803
6h	9231.91	9415.2	9393.88	10384.9	10029.4	11047.2
12h	8700.48	8557.88	8477.77	8160.27	8282.53	8003.08
24h	418.829	339.207	362.188	403.727	416.956	433.259
