# Supplementary material for: Bone marrow Adipoq-lineage progenitors are a major cellular source of M-CSF that dominates bone marrow macrophage development, osteoclastogenesis, and bone mass
Source: eLife journal article supplement (doi:10.7554/elife.82118), 2023-02-13
Supplement: supp [file elife-82118-supp-v1.zip]

## Sheet: Fig.2A
Csf1
E-Adipocyte	I-Adipocyte	B-Adipocyte	BMAds	Bone marrow Adipoq- lineage progenitors				GAPDH					M-CSF
0.977386	2.14042	2.02327	0.911982	35.3846				Threshold cycle					Threshold cycle
0.817089	0.952261	2.87075	0.395843	38.3687				1st	2nd	3rd	average	label	1st	2nd	3rd	average
2.27353	1.64693	1.6737	1.60794	35.0251			E-Adipocyte1	24.2096	24.2253	24.2203	24.2184	1	28.7926	28.5387	29.2275	28.6657
1.95532	1.57807	2.05182	1.00357	26.3329			E-Adipocyte2	23.9196	23.8199	23.9483	23.8959	2	28.696	28.955	28.6519	28.7677
1.30332	1.50869	1.95891	0.722943	37.447			E-Adipocyte3	24.3368	24.1352	24.1766	24.2162	3	27.5355	27.6947	27.5907	27.607
							E-Adipocyte4	24.3296	24.3731	24.3834	24.362	4	27.913	27.9842	28.0112	27.9695
							E-Adipocyte5	24.0233	23.9608	24.0264	24.0035	5	28.5221	28.0429	28.0699	28.2116
							I-Adipocyte1	24.4071	24.2657	24.3471	24.3399	6	27.9541	27.5064	28.0481	27.8362
							I-Adipocyte2	24.0002	24.1732	24.0246	24.066	7	28.6602	28.773	28.7015	28.7116
							I-Adipocyte3	23.8455	23.9572	23.8978	23.9001	8	27.6492	27.8875	27.737	27.7579
							I-Adipocyte4	25.3734	25.0755	25.4018	25.2835	9	29.0741	29.4332	29.1175	29.2083
							I-Adipocyte5	25.4051	25.2865	25.4083	25.3667	10	29.339	29.0998	29.6576	29.3655
							B-Adipocyte1	25.0449	25.1894	25.2113	25.1485	11	28.6347	28.8224	28.668	28.7084
							B-Adipocyte2	23.9032	23.7734	23.7935	23.8234	12	26.845	26.8401	26.9458	26.877
							B-Adipocyte3	24.142	24.1261	24.1207	24.1296	13	27.9714	27.9387	27.9726	27.9609
							B-Adipocyte4	24.8244	24.7829	24.7727	24.7933	14	28.3857	28.2483	28.3618	28.3319
							B-Adipocyte5	23.8668	23.7606	23.8711	23.8328	15	27.4514	27.4082	27.4519	27.4372
							BMAds1	22.8973	22.9016	22.9572	22.9187	16	27.6588	27.4619	27.7743	27.6317
							BMAds2	23.0125	23.0486	23.0594	23.0402	17	29.0374	28.9489	28.8727	28.953
							BMAds3	23.8758	23.7694	23.8069	23.8174	18	27.7002	27.8693	27.5657	27.7117
							BMAds4	23.8561	23.7839	23.8511	23.8304	19	28.7101	28.3018	28.2311	28.4144
							BMAds5	24.1377	24.1076	24.1209	24.1221	20	29.2835	29.1206	29.096	29.1667
							Adipoq+1	24.475	24.4354	24.6971	24.5358	16	23.895	24.1585	23.8596	23.971
							Adipoq+2	24.2583	24.3853	24.4408	24.3615	17	23.7248	23.6356	23.6626	23.6743
							Adipoq+6	24.3744	24.5979	24.5935	24.5219	21	23.958	24.0364	23.906	23.9668
							Adipoq+7	25.2973	25.295	25.4547	25.349	22	25.2618	25.3653	25.0097	25.2123
							Adipoq+5	25.3452	25.0903	25.5027	25.3127	20	24.6454	24.8709	24.4895	24.6686
Lpl
E-Adipocyte	I-Adipocyte	B-Adipocyte	BMAds	Bone marrow Adipoq- lineage progenitors
1.03807	4.35142	0.385167	0.177684	12.3329
1.51703	1.5514	0.674508	0.063338	16.2436
1.12856	3.14969	0.301084	0.37756	14.0206
1.12612	2.0086	0.252586	0.221017	13.9475
1.66383	1.98089	0.434249	0.140693	11.5612
cluster	Cell No.
Adipoq-lineage progenitors	3677
Osteoblast lineage	166
Endothelial cells	34
Neutrophils	3605
Dendritric cells	1739
Monocytes	1206
T cells	876
Erythroid cells	1617
B cells	346
Plasma cells	324

## Sheet: Script
Script:
