# Supplementary material for: Bone marrow Adipoq-lineage progenitors are a major cellular source of M-CSF that dominates bone marrow macrophage development, osteoclastogenesis, and bone mass
Source: eLife journal article supplement (doi:10.7554/elife.82118), 2023-02-13
Supplement: supp [file elife-82118-supp-v1.zip]

Fig. 2-figure supplement 1

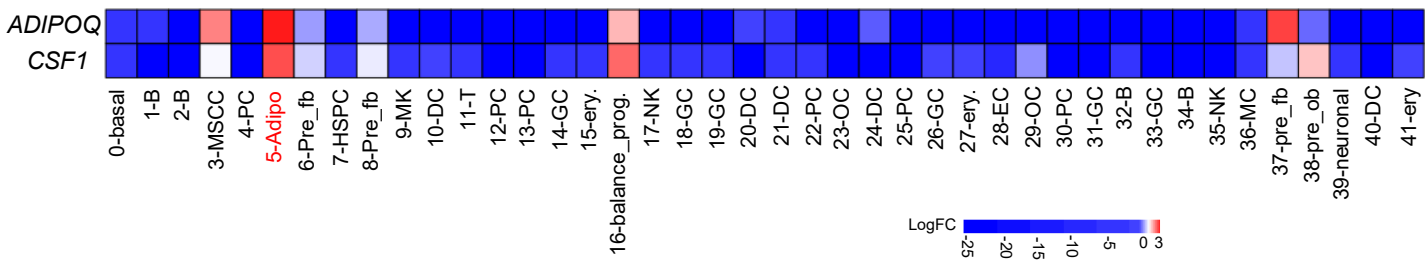

| Cluster ID | Cell type                              | Cluster ID | Cell type                          |
|------------|----------------------------------------|------------|------------------------------------|
| 0          | KRT5-enriched basal cells              | 21         | Dendritic cells                    |
| 1          | B-cell progenitors                     | 22         | Plasma cells                       |
| 2          | B-cell progenitors                     | 23         | osteocondrogenic progenitors (OCs) |
| 3          | multipotent stromal stem cells (MSSCs) | 24         | Dendritic cells                    |
| 4          | Plasma cells                           | 25         | Plasma cells                       |
| 5          | adipo-primed progenitors               | 26         | Granulocytic cells                 |
| 6          | pre-fibroblasts                        | 27         | Erythroid cells                    |
| 7          | HSPC/CD34-enriched                     | 28         | endothelial cells                  |
| 8          | pre-fibroblasts                        | 29         | osteocondrogenic progenitors (OCs) |
| 9          | Megakaryocytes                         | 30         | Plasma cells                       |
| 10         | Dendritic cells                        | 31         | Granulocytic cells                 |
| 11         | T cells                                | 32         | B-cell progenitors                 |
| 12         | Plasma cells                           | 33         | Granulocytic cells                 |
| 13         | Plasma cells                           | 34         | B-cell progenitors                 |
| 14         | Granulocytic cells                     | 35         | NK cells                           |
| 15         | Erythroid cells                        | 36         | Monocytes                          |
| 16         | balanced progenitors                   | 37         | pre-fibroblasts                    |
| 17         | NK cells                               | 38         | pre-osteoblasts                    |
| 18         | Granulocytic cells                     | 39         | neuronal enriched cells            |
| 19         | Granulocytic cells                     | 40         | Dendritic cells                    |
| 20         | Dendritic cells                        | 41         | Erythroid cells                    |
