# Supplementary material for: Bone marrow Adipoq-lineage progenitors are a major cellular source of M-CSF that dominates bone marrow macrophage development, osteoclastogenesis, and bone mass
Source: eLife journal article supplement (doi:10.7554/elife.82118), 2023-02-13
Supplement: supp [file Fig. 2-source data 2.xlsx]

## Sheet: Fig2-source data 2
Cell type	Markers
ADIPOQ-lineage progenitors	CXCL12, LEPR, ADIPOQ
Osteoblast lineage	RUNX2,SP7,BGLAP
Endothelial cells	CDH5,PECAM1
Neutrophils	S100A8,S100A12
Macrophages	CD68, CD163
Dendritic cells	BCL11A,IRF8,IRF7
Monocytes	CD14,LYZ
T cells	CD3E
Erythroid cells	HBB,HBA1
B cells	CD19
Plasma cells	CD38,CD138
