# Supplementary material for: Bone marrow Adipoq-lineage progenitors are a major cellular source of M-CSF that dominates bone marrow macrophage development, osteoclastogenesis, and bone mass
Source: eLife journal article supplement (doi:10.7554/elife.82118), 2023-02-13
Supplement: supp [file Fig. 3-figure supplement 1-source data 1.xlsx]

## Sheet: Fig. 3-figure supplement 1
E-Adipocyte	I-Adipocyte	B-Adipocyte	BMAds	Bone marrow Adipoq- lineage progenitors
0.977386	2.20124	2.73121	0.562693	22.8789
0.840151	1.17839	4.18511	0.229821	24.4022
2.14586	1.7726	3.25021	0.973079	21.5293
1.86612	1.8646	3.44659	0.586469	15.6253
1.23388	1.69012	3.24484	0.639462	21.6015
Sample	GAPDH	b-actin	geometric mean	M-CSF
				Threshold cycle
	average	average		1st	2nd	3rd	average
E-Adipocyte1	24.2184	23.09	23.6475	28.7926	28.5387	29.2275	28.6657
E-Adipocyte2	23.8959	22.8462	23.3652	28.696	28.955	28.6519	28.7677
E-Adipocyte3	24.2162	22.9253	23.5619	27.5355	27.6947	27.5907	27.607
E-Adipocyte4	24.362	23.1022	23.7237	27.913	27.9842	28.0112	27.9695
E-Adipocyte5	24.0035	22.7212	23.3536	28.5221	28.0429	28.0699	28.2116
I-Adipocyte1	24.3399	23.2905	23.8094	27.9541	27.5064	28.0481	27.8362
I-Adipocyte2	24.066	23.5418	23.8025	28.6602	28.773	28.7015	28.7116
I-Adipocyte3	23.9001	22.9795	23.4353	27.6492	27.8875	27.737	27.7579
I-Adipocyte4	25.2835	24.6274	24.9533	29.0741	29.4332	29.1175	29.2083
I-Adipocyte5	25.3667	24.559	24.9596	29.339	29.0998	29.6576	29.3655
B-Adipocyte1	25.1485	24.8731	25.0104	28.6347	28.8224	28.668	28.7084
B-Adipocyte2	23.8234	23.7692	23.7963	26.845	26.8401	26.9458	26.877
B-Adipocyte3	24.1296	24.9089	24.5162	27.9714	27.9387	27.9726	27.9609
B-Adipocyte4	24.7933	25.1493	24.9707	28.3857	28.2483	28.3618	28.3319
B-Adipocyte5	23.8328	24.1482	23.99	27.4514	27.4082	27.4519	27.4372
BMAds1	22.9187	20.4536	21.6511	27.6588	27.4619	27.7743	27.6317
BMAds2	23.0402	20.4092	21.6848	29.0374	28.9489	28.8727	28.953
BMAds3	23.8174	21.2968	22.5219	27.7002	27.8693	27.5657	27.7117
BMAds4	23.8304	21.2145	22.4844	28.7101	28.3018	28.2311	28.4144
BMAds5	24.1221	22.6494	23.3741	29.2835	29.1206	29.096	29.1667
Adipoq+1	24.5358	22.1945	23.3358	23.895	24.1585	23.8596	23.971
Adipoq+2	24.3615	21.9752	23.1376	23.7248	23.6356	23.6626	23.6743
Adipoq+3	24.5219	22.042	23.2489	23.958	24.0364	23.906	23.9668
Adipoq+4	25.349	22.7703	24.0251	25.2618	25.3653	25.0097	25.2123
Adipoq+5	25.3127	22.657	23.9481	24.6454	24.8709	24.4895	24.6686
