# Supplementary material for: Bone marrow Adipoq-lineage progenitors are a major cellular source of M-CSF that dominates bone marrow macrophage development, osteoclastogenesis, and bone mass
Source: eLife journal article supplement (doi:10.7554/elife.82118), 2023-02-13
Supplement: supp [file Fig. 7-figure supplement 1-source data 1.xlsx]

## Sheet: Fig. 7-figure supplement 1
Sham	OVX
0.95773	0.946043
1.03373	0.986982
0.969555	1.13352
	0.914814
