# Supplementary material for: Bone marrow Adipoq-lineage progenitors are a major cellular source of M-CSF that dominates bone marrow macrophage development, osteoclastogenesis, and bone mass
Source: eLife journal article supplement (doi:10.7554/elife.82118), 2023-02-13
Supplement: supp [file Fig1-source data 1.xlsx]

## Sheet: Fig.1A
cluster	Cell No.
Chondrocytes	5224
EC-Arteriar	454
EC-Arteriolar	2435
EC-Sinusoidal	7689
Fibroblasts	5749
MSPC-Adipo/Adipoq-lineage Progenitors	6441
MSPC-osteo	2247
Myofibroblasts	439
Osteo	1082
Osteoblasts	512
Pericytes	290

## Sheet: Fig.1B
features.plot	id	pct.exp	avg.exp.scaled
Adipoq	Chondrocytes	3.94334	0
Csf1	Chondrocytes	3.84763	0
Lepr	Chondrocytes	3.2925	0
Cxcl12	Chondrocytes	38.438	0
Kitl	Chondrocytes	2.54594	0
Cebpa	Chondrocytes	7.52297	0
Lpl	Chondrocytes	6.12557	0
Prrx1	Chondrocytes	15.6585	0
Runx2	Chondrocytes	30.5322	0
Sp7	Chondrocytes	31.183	0.153323
Dmp1	Chondrocytes	0.363706	0
Bglap	Chondrocytes	28.7136	0
Ibsp	Chondrocytes	26.7802	0
Alpl	Chondrocytes	38.5145	0
Pecam1	Chondrocytes	12.098	0
Cdh5	Chondrocytes	3.17764	0
Adipoq	EC-Arteriar	1.54185	0
Csf1	EC-Arteriar	6.1674	0
Lepr	EC-Arteriar	10.1322	0
Cxcl12	EC-Arteriar	61.8943	0
Kitl	EC-Arteriar	37.4449	0.304195
Cebpa	EC-Arteriar	3.30396	0
Lpl	EC-Arteriar	20.7048	0
Prrx1	EC-Arteriar	0.440529	0
Runx2	EC-Arteriar	0.881057	0
Sp7	EC-Arteriar	0.440529	0
Dmp1	EC-Arteriar	0	0
Bglap	EC-Arteriar	1.54185	0
Ibsp	EC-Arteriar	5.28634	0
Alpl	EC-Arteriar	3.0837	0
Pecam1	EC-Arteriar	88.1057	2.44849
Cdh5	EC-Arteriar	73.7885	1.46942
Adipoq	EC-Arteriolar	2.38193	0
Csf1	EC-Arteriolar	5.87269	0
Lepr	EC-Arteriolar	2.09446	0
Cxcl12	EC-Arteriolar	52.8542	0
Kitl	EC-Arteriolar	29.8563	0.00665528
Cebpa	EC-Arteriolar	4.68172	0
Lpl	EC-Arteriolar	6.44764	0
Prrx1	EC-Arteriolar	1.19097	0
Runx2	EC-Arteriolar	0.862423	0
Sp7	EC-Arteriolar	0.533881	0
Dmp1	EC-Arteriolar	0.287474	0
Bglap	EC-Arteriolar	4.72279	0
Ibsp	EC-Arteriolar	7.6386	0
Alpl	EC-Arteriolar	8.33676	0
Pecam1	EC-Arteriolar	84.6407	1.37377
Cdh5	EC-Arteriolar	85.9959	1.81502
Adipoq	EC-Sinusoidal	4.92912	0
Csf1	EC-Sinusoidal	8.73976	0
Lepr	EC-Sinusoidal	5.52738	0
Cxcl12	EC-Sinusoidal	26.4014	0
Kitl	EC-Sinusoidal	2.71817	0
Cebpa	EC-Sinusoidal	10.0793	0
Lpl	EC-Sinusoidal	33.3333	0
Prrx1	EC-Sinusoidal	0.897386	0
Runx2	EC-Sinusoidal	0.975419	0
Sp7	EC-Sinusoidal	0.273117	0
Dmp1	EC-Sinusoidal	0.273117	0
Bglap	EC-Sinusoidal	2.15893	0
Ibsp	EC-Sinusoidal	9.33802	0
Alpl	EC-Sinusoidal	1.13149	0
Pecam1	EC-Sinusoidal	65.8863	0.227356
Cdh5	EC-Sinusoidal	87.7097	1.36003
Adipoq	Fibroblasts	1.8438	0
Csf1	Fibroblasts	14.1416	0
Lepr	Fibroblasts	13.1153	0
Cxcl12	Fibroblasts	26.2306	0
Kitl	Fibroblasts	1.91338	0
Cebpa	Fibroblasts	5.61837	0
Lpl	Fibroblasts	6.19238	0
Prrx1	Fibroblasts	55.3488	0.856311
Runx2	Fibroblasts	2.69612	0
Sp7	Fibroblasts	0.887111	0
Dmp1	Fibroblasts	0.208732	0
Bglap	Fibroblasts	3.23535	0
Ibsp	Fibroblasts	20.8384	0
Alpl	Fibroblasts	3.47887	0
Pecam1	Fibroblasts	11.9325	0
Cdh5	Fibroblasts	1.80901	0
Adipoq	MSPC-Adipo	93.7743	2.98432
Csf1	MSPC-Adipo	69.9426	2.57426
Lepr	MSPC-Adipo	80.531	2.95971
Cxcl12	MSPC-Adipo	99.7826	2.93888
Kitl	MSPC-Adipo	88.1851	2.81343
Cebpa	MSPC-Adipo	59.6646	2.85831
Lpl	MSPC-Adipo	93.7898	2.90281
Prrx1	MSPC-Adipo	46.7785	0.597326
Runx2	MSPC-Adipo	40.6148	1.27657
Sp7	MSPC-Adipo	9.54821	0
Dmp1	MSPC-Adipo	1.42835	0
Bglap	MSPC-Adipo	6.31889	0
Ibsp	MSPC-Adipo	89.4426	1.05282
Alpl	MSPC-Adipo	16.9073	0
Pecam1	MSPC-Adipo	7.68514	0
Cdh5	MSPC-Adipo	2.60829	0
Adipoq	MSPC-Osteo	35.069	0.128342
Csf1	MSPC-Osteo	61.2372	1.28732
Lepr	MSPC-Osteo	38.4513	0.240629
Cxcl12	MSPC-Osteo	87.1829	0.364775
Kitl	MSPC-Osteo	47.53	0.2507
Cebpa	MSPC-Osteo	28.5269	0.294053
Lpl	MSPC-Osteo	30.1291	0
Prrx1	MSPC-Osteo	54.3836	0.385984
Runx2	MSPC-Osteo	69.3369	2.29649
Sp7	MSPC-Osteo	53.6271	1.85387
Dmp1	MSPC-Osteo	26.6578	0.637218
Bglap	MSPC-Osteo	66.4441	0
Ibsp	MSPC-Osteo	93.6805	1.96309
Alpl	MSPC-Osteo	84.5572	2.56563
Pecam1	MSPC-Osteo	8.1887	0
Cdh5	MSPC-Osteo	3.64931	0
Adipoq	Myofibroblasts	0.22779	0
Csf1	Myofibroblasts	5.01139	0
Lepr	Myofibroblasts	0.911162	0
Cxcl12	Myofibroblasts	0	0
Kitl	Myofibroblasts	1.36674	0
Cebpa	Myofibroblasts	2.73349	0
Lpl	Myofibroblasts	2.50569	0
Prrx1	Myofibroblasts	5.92255	0
Runx2	Myofibroblasts	0.455581	0
Sp7	Myofibroblasts	0.22779	0
Dmp1	Myofibroblasts	1.36674	0
Bglap	Myofibroblasts	0	0
Ibsp	Myofibroblasts	0.683371	0
Alpl	Myofibroblasts	8.65604	0
Pecam1	Myofibroblasts	16.8565	0
Cdh5	Myofibroblasts	0	0
Adipoq	Osteo	3.23475	0
Csf1	Osteo	17.0055	0
Lepr	Osteo	9.70425	0
Cxcl12	Osteo	37.5231	0
Kitl	Osteo	7.94824	0
Cebpa	Osteo	8.87246	0
Lpl	Osteo	20.61	0
Prrx1	Osteo	60.8133	1.12289
Runx2	Osteo	35.0277	0.288733
Sp7	Osteo	23.1054	0.139288
Dmp1	Osteo	9.51941	0
Bglap	Osteo	53.4196	0
Ibsp	Osteo	58.5028	0.562837
Alpl	Osteo	44.9168	0.938148
Pecam1	Osteo	10.536	0
Cdh5	Osteo	2.31054	0
Adipoq	Osteoblasts	6.25	0
Csf1	Osteoblasts	10.1562	0
Lepr	Osteoblasts	13.8672	0
Cxcl12	Osteoblasts	25.1953	0
Kitl	Osteoblasts	11.5234	0
Cebpa	Osteoblasts	7.8125	0
Lpl	Osteoblasts	5.07812	0
Prrx1	Osteoblasts	65.4297	0
Runx2	Osteoblasts	73.8281	0.394668
Sp7	Osteoblasts	86.9141	1.97619
Dmp1	Osteoblasts	62.6953	2.86823
Bglap	Osteoblasts	97.6562	3
Ibsp	Osteoblasts	98.8281	1.15434
Alpl	Osteoblasts	80.2734	0.509874
Pecam1	Osteoblasts	12.1094	0
Cdh5	Osteoblasts	3.90625	0
Adipoq	Pericytes	3.10345	0
Csf1	Pericytes	5.17241	0
Lepr	Pericytes	2.06897	0
Cxcl12	Pericytes	51.0345	0
Kitl	Pericytes	34.4828	0.0255165
Cebpa	Pericytes	17.931	0.380125
Lpl	Pericytes	59.6552	0.414117
Prrx1	Pericytes	54.1379	1.82651
Runx2	Pericytes	3.44828	0
Sp7	Pericytes	5.17241	0
Dmp1	Pericytes	0.344828	0
Bglap	Pericytes	1.72414	0
Ibsp	Pericytes	5.51724	0
Alpl	Pericytes	6.2069	0
Pecam1	Pericytes	7.93103	0
Cdh5	Pericytes	2.06897	0

## Sheet: Fig.1C
5.93		Flow gating strategy
4.65
2.96
3.23
3.39
