# Supplementary material for: Bone marrow Adipoq-lineage progenitors are a major cellular source of M-CSF that dominates bone marrow macrophage development, osteoclastogenesis, and bone mass
Source: eLife journal article supplement (doi:10.7554/elife.82118), 2023-02-13
Supplement: supp [file Fig2-figure supplement 1-source data1.xlsx]

## Sheet: Fig. 2-suppl 1
Cluster ID	Cell type	Cluster ID	Cell type
0	KRT5-enriched basal cells	21	Dendritic cells
1	B-cell progenitors	22	Plasma cells
2	B-cell progenitors	23	osteochondrogenic progenitors (OCs)
3	multipotent stromal stem cells (MSSCs)	24	Dendritic cells
4	Plasma cells	25	Plasma cells
5	adipo-primed progenitors	26	Granulocytic cells
6	pre-fibroblasts	27	Erythroid cells
7	HSPC/CD34-enriched	28	endothelial cells
8	pre-fibroblasts	29	osteochondrogenic progenitors (OCs)
9	Megakaryocytes	30	Plasma cells
10	Dendritic cells	31	Granulocytic cells
11	T cells	32	B-cell progenitors
12	Plasma cells	33	Granulocytic cells
13	Plasma cells	34	B-cell progenitors
14	Granulocytic cells	35	NK cells
15	Erythroid cells	36	Monocytes
16	balanced progenitors	37	pre-fibroblasts
17	NK cells	38	pre-osteoblasts
18	Granulocytic cells	39	neuronal enriched cells
19	Granulocytic cells	40	Dendritic cells
20	Dendritic cells	41	Erythroid cells
