# Supplementary material for: Bone marrow Adipoq-lineage progenitors are a major cellular source of M-CSF that dominates bone marrow macrophage development, osteoclastogenesis, and bone mass
Source: eLife journal article supplement (doi:10.7554/elife.82118), 2023-02-13
Supplement: supp [file Fig4-source data 1.xlsx]

## Sheet: Fig.4A
WT	KO
1	0.31
1.01	0.07
1.01	0.17
1.04	0.35

## Sheet: Fig.4D
Tibia		Femur
WT	KO	WT	KO
16.95	17.34	15.3	15.21
16.25	16.48	15.14	15.37
16.12	16.57	15.16	15.56
17.04	17.24	15	15.09
16.95	17.02	15.01	15.05
16.55	17.05	14.95	15.06

## Sheet: Fig.4F
BV/TV		BMD		Conn-Dens		Tb.Th.		Tb.Sp.		Tb.N.
WT	KO	WT	KO	WT	KO	WT	KO	WT	KO	WT	KO
10.71	19.04	87.2793	120.087	228.028	369.445	0.0308	0.0453	0.234	0.1568	3.9032	6.0444
12.75	19.22	108.112	141.99	232.761	277.943	0.0363	0.0487	0.1941	0.1784	4.3605	6.0007
12.21	17.23	107.524	132.703	260.65	337.958	0.0366	0.0421	0.1974	0.1579	4.1867	5.3375
12.73	20.18	108.178	151.112	286.945	336.934	0.0341	0.052	0.1717	0.1447	5.5661	6.2213
9.11	19.62	66.06	145.363	254.916	326.745	0.0316	0.0525	0.1893	0.1454	5.0865	6.2883

## Sheet: Fig.4G
Ct.Th			BA/TA
WT	KO		WT	KO
0.1598	0.1726		0.89998	0.91424
0.173	0.174		0.9241	0.91466
0.167	0.179		0.90146	0.91861
0.178	0.185		0.90833	0.91902
0.162	0.18		0.90618	0.91457
0.1826	0.1889		0.9274	0.9283
