# Supplementary material for: Bone marrow Adipoq-lineage progenitors are a major cellular source of M-CSF that dominates bone marrow macrophage development, osteoclastogenesis, and bone mass
Source: eLife journal article supplement (doi:10.7554/elife.82118), 2023-02-13
Supplement: supp [file Fig5-source data 1.xlsx]

## Sheet: Fig.5A
Oc.S/BS		N.Oc/B.Pm
WT	KO	WT	KO
12.6179	5.0339	5.1656	2.6968
13.4617	4.4313	5.9863	2.3354
11.1521	6.2211	7.5612	1.9307
10.6524	3.5524	8.2215	2.6548
10.365	4.2365	5.3261	1.8894

## Sheet: Fig.5B
WT	KO
5.85702	4.64114
5.54234	4.64858
5.75089	4.18867
4.8832	5.38966
6.01343	5.20532
5.69503	4.72679

## Sheet: Fig.5C
Monocyte					Bone marrow flow gating strategy
CSF1f/f	CSF1ΔAdipoQ
30	31.3
34.3	32.8
31.2	29.9
23.5	32.9
28.4	33.5
39.5	32.3
Macrophage
CSF1f/f	CSF1ΔAdipoQ
1.79	0.91
1.89	1.25
2.39	1.08
2.15	1.41
4.89	1.87
2.38	1.58

## Sheet: Fig.5D
WT	KO
102	0
95	0
83	0

## Sheet: Fig.5E
WT	KO
259	244
241	227
232	203
