# Supplementary material for: Bone marrow Adipoq-lineage progenitors are a major cellular source of M-CSF that dominates bone marrow macrophage development, osteoclastogenesis, and bone mass
Source: eLife journal article supplement (doi:10.7554/elife.82118), 2023-02-13
Supplement: supp [file Fig6-source data 1.xlsx]

## Sheet: Fig.6A
WT	KO
98	105
90	116
102	95
96	119
78	83
76	73

## Sheet: Fig.6B
Inguinal Adipose		Epididymal Adipose
WT	KO	WT	KO
233	217	293	260
303	202	325	267
256	284	312	295
187	240	253	232
251	213	312	310
227	262	287	282

## Sheet: Fig.6C
Spleen			Inguinal Adipose			Epididymal Adipose					Spleen flow gating strategy
Monocyte			Monocyte			Monocyte
CSF1f/f	CSF1ΔAdipoQ		CSF1f/f	CSF1ΔAdipoQ		CSF1f/f	CSF1ΔAdipoQ
1.3	1.42		3.64	3.61		3.78	6.69
1.87	1.91		1.76	2.78		3.5	3.68
2.2	2.22		1.48	6.11		5.78	6.18
1.39	1.29		1.5	5.77		3.85	3.25
1.6	2.68		1.29	0.82		5.82	5.47
2.47	1.53		2.64	2.68		2.64	1.71
Macrophage			Macrophage			Macrophage
CSF1f/f	CSF1ΔAdipoQ		CSF1f/f	CSF1ΔAdipoQ		CSF1f/f	CSF1ΔAdipoQ
0.42	0.66		5.61	4.5		9.61	6.13
0.53	0.49		1.19	5.42		3.7	8.59
0.37	0.53		2.78	7.61		3.99	4.32
0.47	0.56		1.62	4.54		4.59	3.9
0.62	0.56		0.98	1.47		3.4	8.15
0.61	0.55		5.86	4.47		5.86	4.47
											Adipose tissue flow gating strategy
