# Supplementary material for: Bone marrow Adipoq-lineage progenitors are a major cellular source of M-CSF that dominates bone marrow macrophage development, osteoclastogenesis, and bone mass
Source: eLife journal article supplement (doi:10.7554/elife.82118), 2023-02-13
Supplement: supp [file Fig7-source data 1.xlsx]

## Sheet: Fig.7A
WT		KO
sham	ovx	sham	ovx
169	32	165	41
154	33	135	33
153	31	175	43
184	41	189	38
166	36	174	31
174	38	164	36
182	31	181	34

## Sheet: Fig.7C
BV/TV				Tb.N.				Tb.Th.				Tb.Sp.				Conn-Dens
WT		KO		WT		KO		WT		KO		WT		KO		WT		KO
sham	ovx	sham	ovx	sham	ovx	sham	ovx	sham	ovx	sham	ovx	sham	ovx	sham	ovx	sham	ovx	sham	ovx
5.25	3.18	8.69	5.24	3.3228	3.1378	3.984	3.5695	0.0349	0.0285	0.0399	0.0304	0.2769	0.316	0.2394	0.2721	91.9426	44.4405	148.64	113.185
5.75	3.52	9.38	6.91	3.5244	2.5893	4.1649	3.8591	0.0373	0.0344	0.0408	0.0337	0.2987	0.391	0.2299	0.2582	104.319	72.8833	141.492	143.464
5.76	3.65	9.27	7.63	3.3	3.2922	3.8592	3.7594	0.0348	0.0337	0.0403	0.0341	0.3031	0.3019	0.2498	0.2395	95.715	58.0438	165.431	110.021
4.55	3.08	10.77	8.32	3.3739	3.2487	3.7608	3.9447	0.033	0.0327	0.0372	0.0363	0.2965	0.3072	0.2598	0.244	114.101	73.3554	165.437	144.11
5.42	3.84	10.78	10.06	3.5955	2.7955	4.1091	3.5329	0.0362	0.0319	0.039	0.0388	0.2977	0.3573	0.2326	0.2365	83.129	46.4635	156.137	153.325
4.74	3.06	11.07	9.07	3.345	3.0754	4.1962	3.4631	0.034	0.0325	0.0392	0.0355	0.2897	0.3227	0.2306	0.229	90.1661	59.4967	165.156	127.498
5.25	3.49	9.9	8.01	3.4242	3.0382	4.1215	3.82022	0.0377	0.0287	0.0373	0.0364	0.3027	0.3276	0.2353	0.2311	93.8681	51.3945	169.395	158.205

## Sheet: Fig.7D
Oc.S/BS				N.Oc/B.Pm
WT		KO		WT		KO
sham	ovx	sham	ovx	sham	ovx	sham	ovx
18.1447	32.0196	8.1649	13.5121	11.209	23.7009	4.0021	8.7974
19.2419	31.4431	7.4462	11.9514	10.4409	20.0011	3.5092	6.6756
24.1855	28.594	9.8333	10.3988	13.4462	18.9965	4.7593	5.65
17.5552	30.2036	8.4865	10.968	9.7874	21.9484	2.8241	5.4212
20.1407	35.7432	8.1768	12.4704	11.2048	19.3659	3.6772	6.441
21.3132	34.1011	6.448	11.2996	13.6401	21.2493	4.1151	6.0482
24.717	35.4997	8.46	10.9981	15.5098	25.0471	5.5641	5.3978
