# Supplementary figures and images for: Bone marrow Adipoq-lineage progenitors are a major cellular source of M-CSF that dominates bone marrow macrophage development, osteoclastogenesis, and bone mass
Source: eLife journal article supplement (doi:10.7554/elife.82118), 2023-02-13

Fig. 4-figure supplement 5

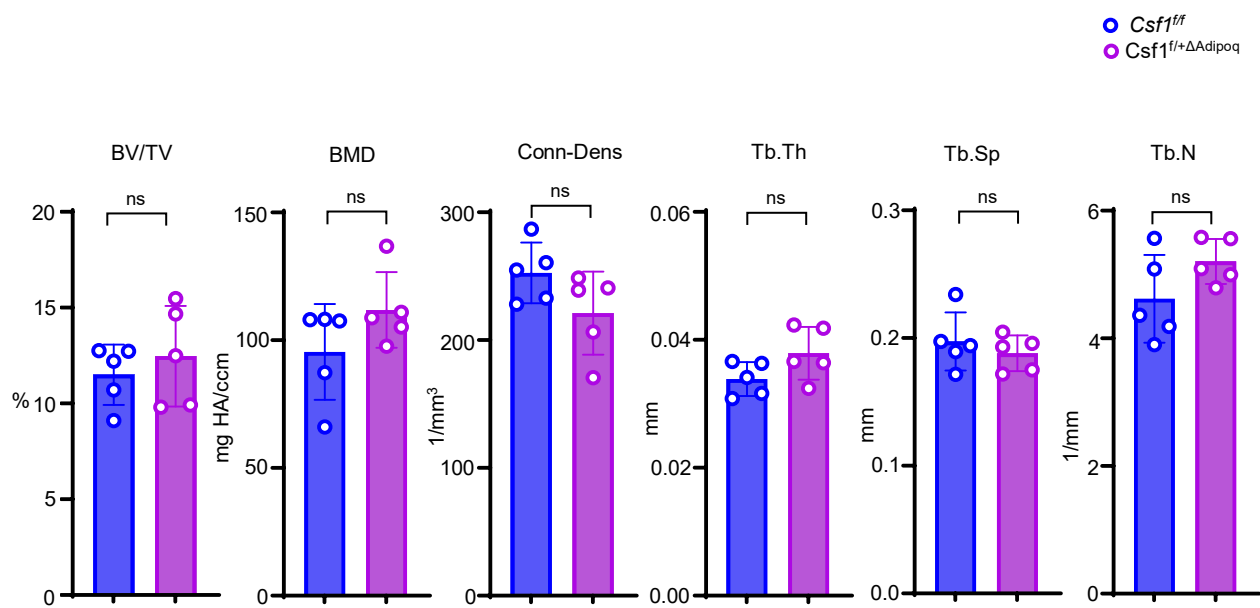

Supplement: supp [file elife-82118-supp-v1.zip]

Fig. 3-figure supplement 1

*Csf1*  
(relative to geometric mean of *Gapdh* and *Actb*)

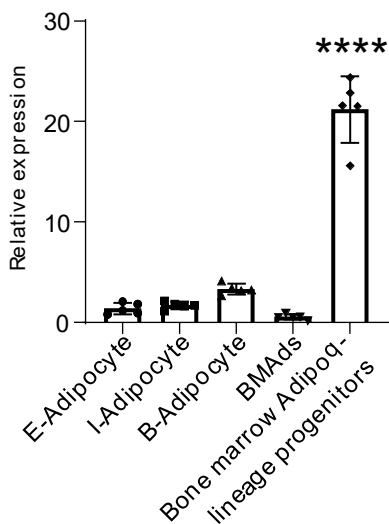

Supplement: supp [file elife-82118-supp-v1.zip]

Fig. 5-figure supplement 1

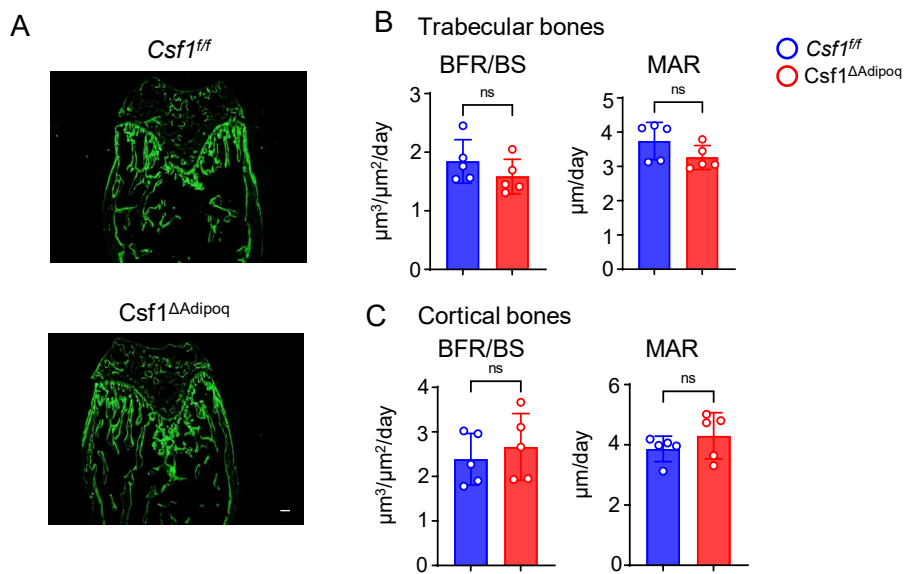

Supplement: supp [file elife-82118-supp-v1.zip]

Fig. 7-figure supplement 1

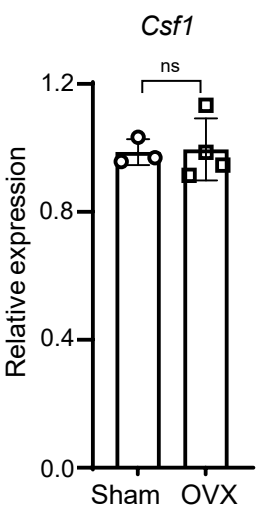

Supplement: supp [file elife-82118-supp-v1.zip]

Fig. 5-figure supplement 2

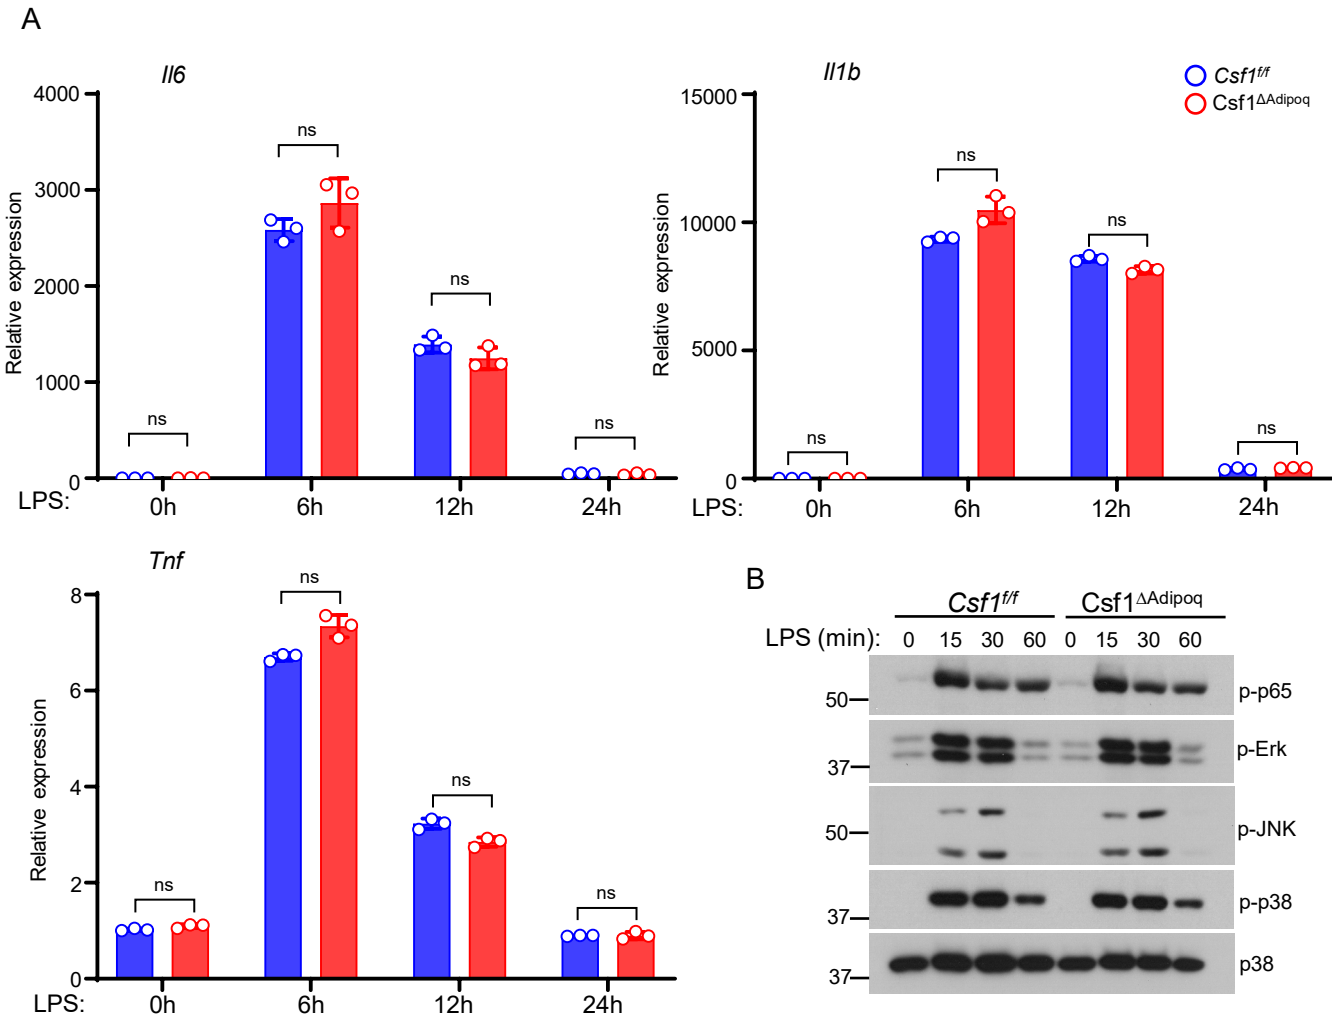

Supplement: supp [file elife-82118-supp-v1.zip]

Fig. 4-figure supplement 6

A

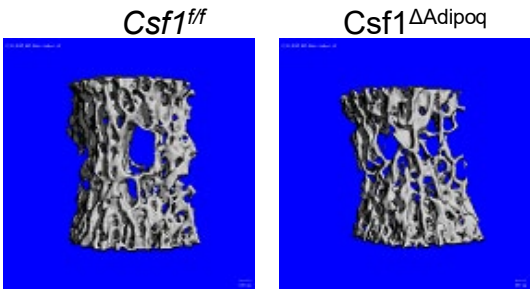

B

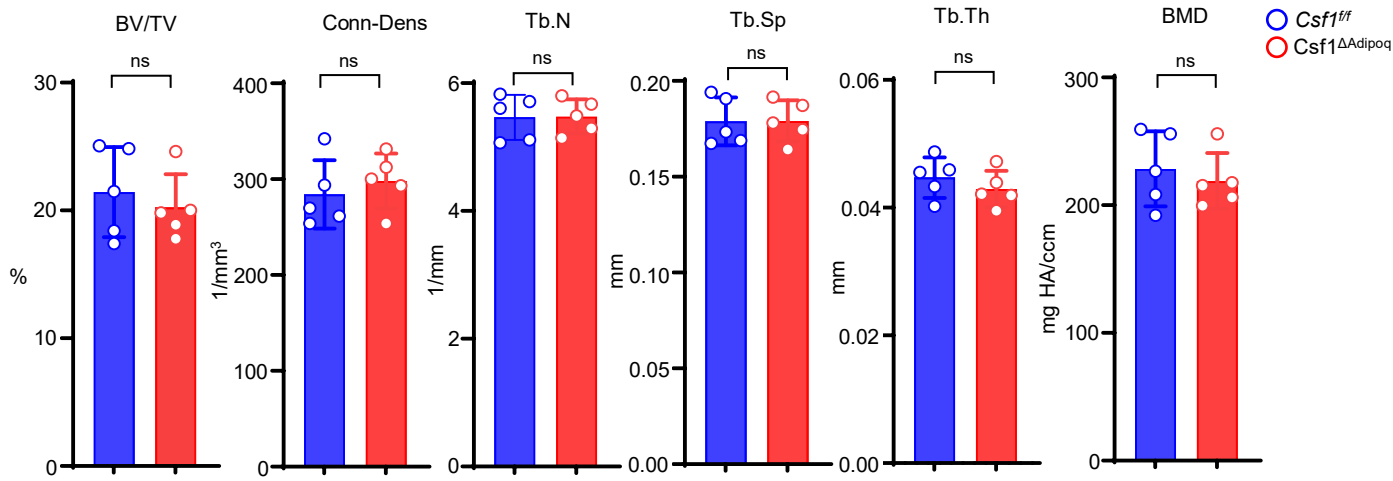

Supplement: supp [file elife-82118-supp-v1.zip]

Fig. 4-figure supplement 4

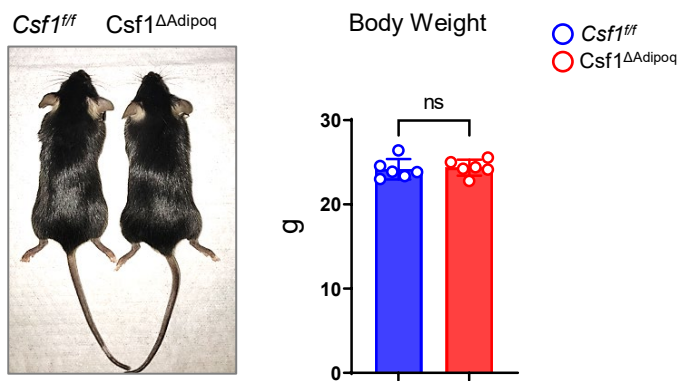

Supplement: supp [file elife-82118-supp-v1.zip]

Fig. 4-figure supplement 1

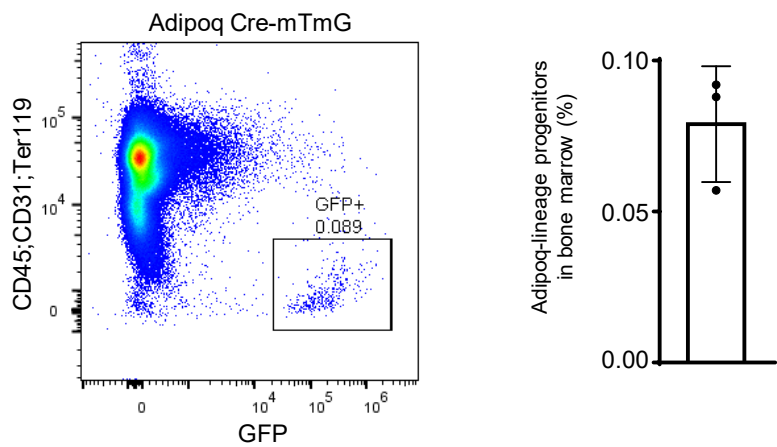

Supplement: supp [file elife-82118-supp-v1.zip]

Fig. 4-figure supplement 2

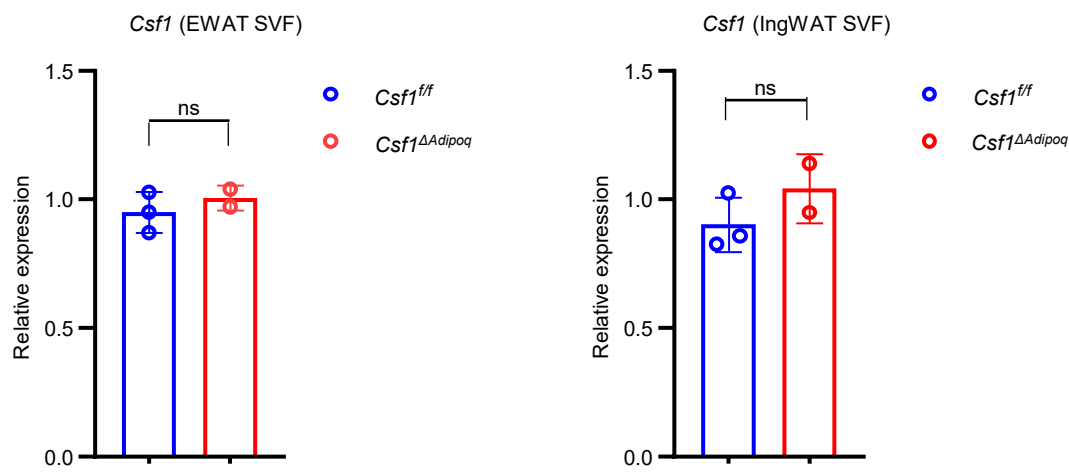

Supplement: supp [file elife-82118-supp-v1.zip]

Fig. 4-figure supplement 3

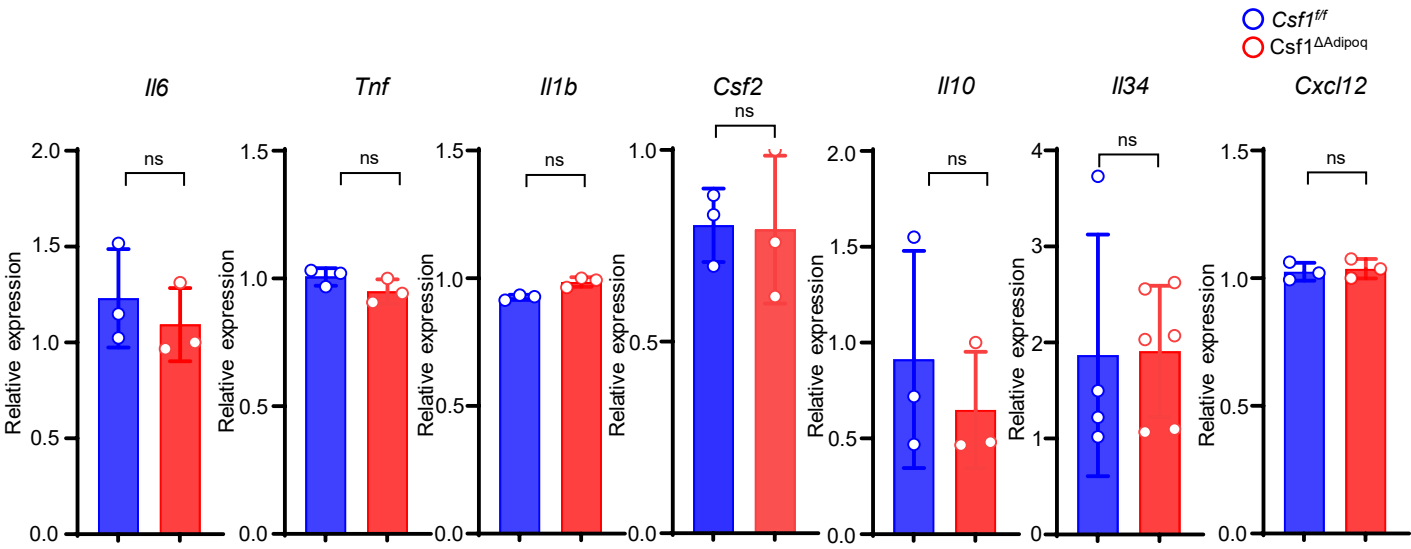

Supplement: supp [file elife-82118-supp-v1.zip]
